# Supplementary material for: The inflammatory and normal transcriptome of mouse bladder detrusor and mucosa
Source: PubMed Central journal article supplement (PMC1382248; doi:10.1186/1472-6793-6-1), 2006-01-18
Supplement: 1472-6793-6-1-S5.pdf [file 1472-6793-6-1-S5.pdf]

**Additional file 5** shows the reduced message of a known housekeeping gene between the subtracted and un-subtracted cDNA over the same number of PCR cycles.

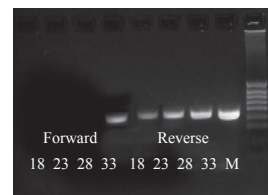

Additional  
File 5
